# Supplementary material for: Robust deep learning based protein sequence design using ProteinMPNN
Source: PubMed Central journal article supplement (PMC9997061; doi:10.1126/science.add2187), 2022-09-15
Supplement: NIHMS1874648-supplement-Supp_T1.pdf [file NIHMS1874648-supplement-Supp_T1.pdf]

# Supplementary Materials for

## Robust deep learning based protein sequence design using ProteinMPNN

J. Dauparas<sup>1,2</sup>, I. Anishchenko<sup>1,2</sup>, N. Bennett<sup>1,2,4</sup>, H. Bai<sup>1,2</sup>, R. J. Ragotte<sup>1,2</sup>, L. F. Milles<sup>1,2</sup>, B. I. M. Wicky<sup>1,2</sup>, A. Courbet<sup>1,2,3</sup>, R. J. de Haas<sup>6</sup>, N. Bethel<sup>1,2,3</sup>, P. J. Y. Leung<sup>1,2,4</sup>, T. F. Huddy<sup>1,2</sup>, S. Pellock<sup>1,2</sup>, D. Tischer<sup>1,2</sup>, F. Chan<sup>1,2</sup>, B. Koepnick<sup>1,2</sup>, H. Nguyen<sup>1,2</sup>, A. Kang<sup>1,2</sup>, B. Sankaran<sup>5</sup>, A. K. Bera<sup>1,2</sup>, N. P. King<sup>1,2</sup>, D. Baker<sup>1,2,3\*</sup>

<sup>1</sup> Department of Biochemistry, University of Washington, Seattle, WA, USA.

<sup>2</sup> Institute for Protein Design, University of Washington, Seattle, WA, USA.

<sup>3</sup> Howard Hughes Medical Institute, University of Washington, Seattle, WA, USA.

<sup>4</sup> Molecular Engineering Graduate Program, University of Washington, Seattle, WA, USA

<sup>5</sup> Berkeley Center for Structural Biology, Molecular Biophysics and Integrated Bioimaging, Lawrence Berkeley Laboratory, 1 Cyclotron Road, Berkeley, CA 94720, USA.

<sup>6</sup> Department of Physical Chemistry and Soft Matter, Wageningen University and Research, Wageningen, The Netherlands.

Correspondence to: [dabaker@uw.edu](mailto:dabaker@uw.edu)

**This PDF file includes:**

Tables S1 to S1

|                                   |                                 |
|-----------------------------------|---------------------------------|
|                                   | <b>HALC1_878 (PDB ID: 8CYK)</b> |
| <b>Data Collection</b>            |                                 |
| Space group                       | I 1 2 1                         |
| Cell dimensions                   |                                 |
| a, b, c (Å)                       | 64.17, 55.45, 82.81             |
| $\alpha$ , $\beta$ , $\gamma$ (°) | 90.00, 94.00, 90.00             |
| Resolution (Å)                    | 48.98 - 1.65 (1.709 - 1.65)     |
| Rmerge (%)                        | 2.1 (19.4)                      |
| Rpim (%)                          | 2.1 (19.4)                      |
| $\sigma(I)$                       | 15.91 (3.96)                    |
| CC 1/2                            | 0.999 (0.942)                   |
| Completeness (%)                  | 96.85 (95.70)                   |
| Redundancy                        | 2.0 (2.0)                       |
| <b>Refinement</b>                 |                                 |
| No. unique reflections            | 33946 (3322)                    |
| Rwork / Rfree (%)                 | 18.5 (24.0) / 21.7 (28.1)       |
| No. non-hydrogen atoms            | 2366                            |
| Macromolecules                    | 2151                            |
| Water                             | 215                             |
| Ramachandran favoured/allowed     | 98.83/1.17                      |
| <b>R.m.s. deviations</b>          |                                 |
| Bond lengths (Å)                  | 0.011                           |
| Bond angles (°)                   | 1.12                            |
| <b>B-factors (Å<sup>2</sup>)</b>  |                                 |
| Macromolecules                    | 28.36                           |
| Solvent                           | 39.25                           |

**Table S1. Crystallographic statistics for HALC1\_878.**
